# Supplementary material
Source: Springer Nature journal article supplement (https://www.springermedizin.de/resource/supplementary/13017_2012_264_MOESM2_ESM.pdf/9635794)

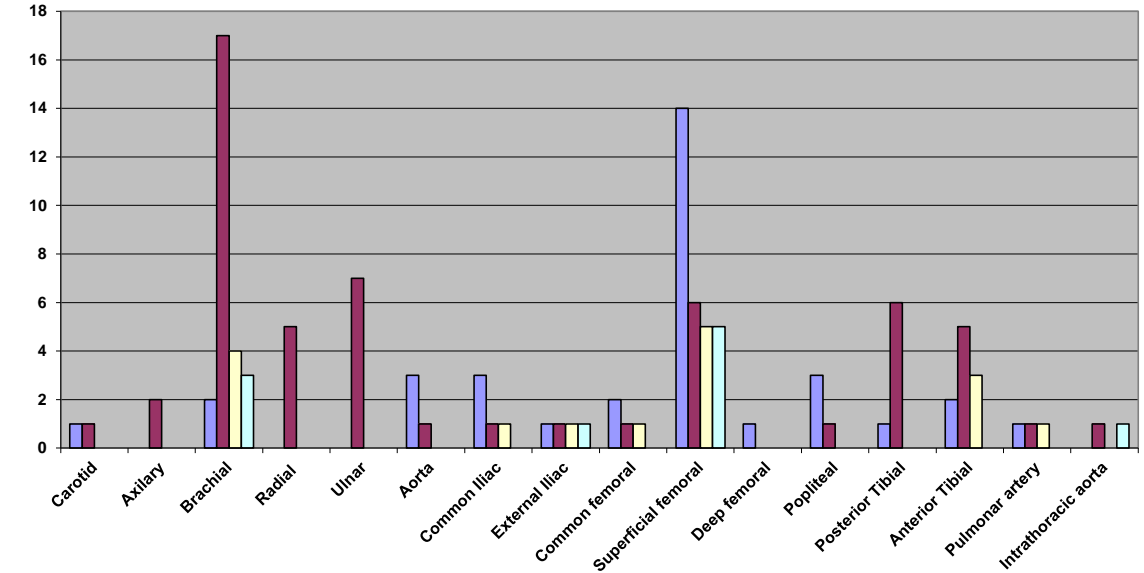

■ Gunshot injuries

■ Sharp injuries

■ Blunt injuries

■ Landmine injuries

Supplement: MOESM2 [file 9635794]
